# Supplementary material for: A pass too far: dissociation of internal energy selected paracyclophane cations, theory and experiment
Source: Royal Society of Chemistry journal article supplement (doi:10.1039/c2cp40905d), 2012-01-01
Supplement: c2cp40905d.pdf [file c2cp40905d.pdf]

# Supplementary Material to the Paper: A Pass Too Far: Dissociation of Internal Energy Selected Paracyclophane Cations, Theory and Experiment

Patrick Hemberger,<sup>a</sup> Andras Bodi,<sup>a</sup> Christof Schon,<sup>b</sup> Michael Steinbauer,<sup>b</sup> Kathrin H. Fischer,<sup>b</sup>  
Conrad Kaiser,<sup>c</sup> Ingo Fischer<sup>b</sup>

<sup>a</sup> Paul Scherrer Institut, Molecular Dynamics Group, CH-5232 Villigen PSI, Switzerland

<sup>b</sup> Institute of Physical and Theoretical Chemistry, University of Würzburg, Am Hubland,  
D-97074 Würzburg

<sup>c</sup> Institute of Organic Chemistry, University of Würzburg, Am Hubland, D-97074 Würzburg

## 1 Geometries

This supplementary material lists the most important geometry parameters of the three investigated paracyclophane derivatives. In Figure S1 the numbered carbon skeleton is depicted. Bond length and angles can be found in Table S1. The twist ( $\theta_{twist}$ ) - and the shift ( $\theta_{shift}$ ) angles are calculated after the following equation:

$$\theta_{twist} = \frac{1}{8} [\theta(C_1-C_2-C_3-C_4) + \theta(C_1-C_2-C_3-C_8) + \theta(C_2-C_1-C_{14}-C_{13}) + \theta(C_2-C_1-C_{14}-C_{15}) \\ + \theta(C_{10}-C_9-C_6-C_5) + \theta(C_{10}-C_9-C_6-C_7) + \theta(C_9-C_{10}-C_{11}-C_{12}) + \theta(C_9-C_{10}-C_{11}-C_{16})]$$

$$\theta_{shift} = \frac{1}{8} [\theta(C_1-C_2-C_3-C_4) + \theta(C_1-C_2-C_3-C_8) + \theta(C_2-C_1-C_{14}-C_{13}) + \theta(C_2-C_1-C_{14}-C_{15}) \\ - \theta(C_{10}-C_9-C_6-C_5) - \theta(C_{10}-C_9-C_6-C_7) - \theta(C_9-C_{10}-C_{11}-C_{12}) - \theta(C_9-C_{10}-C_{11}-C_{16})]$$

|                |                                     | neutral    |       |                 | ion   |                 |
|----------------|-------------------------------------|------------|-------|-----------------|-------|-----------------|
|                |                                     | exp. [1,2] | B3LYP | $\omega$ B97X-D | B3LYP | $\omega$ B97X-D |
| <i>o</i> -DHPC | R(C <sub>1</sub> -C <sub>2</sub> )  | 157        | 160   | 159             | 161   | 158             |
|                | R(C <sub>3</sub> -C <sub>14</sub> ) | 277        | 281   | 279             | 277   | 271             |
|                | R(C <sub>4</sub> -C <sub>13</sub> ) | 302        | 306   | 301             | 301   | 298             |
|                | R(C <sub>8</sub> -C <sub>15</sub> ) | 308        | 320   | 316             | 307   | 303             |
|                | $\theta_{twist}$                    | 9          | 12    | 15              | -2    | 11              |
|                | $\theta_{shift}$                    | -6         | 1     | 0               | 1     | 9               |
| <i>p</i> -DHPC | R(C <sub>1</sub> -C <sub>2</sub> )  | 159        | 161   | 159             | 160   | 158             |
|                | R(C <sub>3</sub> -C <sub>14</sub> ) | 276        | 281   | 278             | 271   | 267             |
|                | R(C <sub>4</sub> -C <sub>13</sub> ) | 305        | 312   | 307             | 303   | 297             |
|                | R(C <sub>8</sub> -C <sub>15</sub> ) | 305        | 311   | 307             | 305   | 301             |
|                | $\theta_{twist}$                    | 0          | 0     | 0               | 0     | -8              |
|                | $\theta_{shift}$                    | 13         | 10    | 15              | -8    | -11             |
| MHPC           | R(C <sub>1</sub> -C <sub>2</sub> )  | 158        | 161   | 159             | 160   | 158             |
|                | R(C <sub>3</sub> -C <sub>14</sub> ) | -          | 281   | 278             | 271   | 270             |
|                | R(C <sub>4</sub> -C <sub>13</sub> ) | -          | 311   | 306             | 306   | 302             |
|                | R(C <sub>8</sub> -C <sub>15</sub> ) | -          | 316   | 311             | 306   | 306             |
|                | $\theta_{twist}$                    | -          | -7    | -9              | -7    | -14             |
|                | $\theta_{shift}$                    | -          | -7    | -9              | 4     | 3               |

Table S1: Calculated geometries (in pm and °) of the neutrals and the ions. Especially in the case of *p*-DHPC a strong geometry change is observed upon ionization in the twist ( $\theta_{twist}$ ) and shift angle ( $\theta_{shift}$ ).



Figure S1: Numbering of the carbon atoms in the paracyclophane frame.

## 2 Molecular Orbitals and TD-DFT calculations

The six highest occupied molecular orbitals of MHPC are depicted in figure S2 relating to the discussion about orbitals involved in the  $\pi$ - $\pi$  interactions in the main paper. In order to calculate more reliable vertical excitation energies TD-DFT calculations were performed (Table S2).

| $eV$           | B3LYP/6-311G(d,p) |             |             |             |             |             | $\omega$ -B97X-D/6-311G(d,p) |                   |             |             |             |             |
|----------------|-------------------|-------------|-------------|-------------|-------------|-------------|------------------------------|-------------------|-------------|-------------|-------------|-------------|
|                | $\tilde{X}$       | $\tilde{A}$ | $\tilde{B}$ | $\tilde{C}$ | $\tilde{D}$ | $\tilde{E}$ | $\tilde{X}$                  | $\tilde{A}$       | $\tilde{B}$ | $\tilde{C}$ | $\tilde{D}$ | $\tilde{E}$ |
| <i>o</i> -DHPC | 7.38              | 7.61        | 8.03        | 8.69        | 9.82        | 10.45       | 7.57                         | 7.70              | 8.37        | 8.91        | 10.29       | 11.04       |
| <i>p</i> -DHPC | 7.43              | 7.78        | 7.81        | 8.61        | 9.86        | 10.37       | 7.59 <sup>a</sup>            | 7.85 <sup>a</sup> | 7.96        | 8.90        | 10.31       | 10.79       |
| MHPC           | 7.50              | 7.71        | 8.10        | 8.89        | 9.84        | 10.33       | 7.67                         | 7.99              | 8.24        | 9.19        | 10.24       | 10.99       |

Table S2: Calculated vertical transition energies to excited and ground ionic states of the three investigated paracyclophanes in  $eV$  from the neutral.  $\tilde{A}$  and  $\tilde{B}$  states are very close in energy. <sup>a</sup>A negative excitation value was computed and ground and excited state are therefore exchanged.



Figure S2: The six highest occupied molecular orbitals of MHPC: HOMO-2 and 3 show  $\pi$ -orbitals of the same phase, which makes a bonded dispersion interaction in these systems possible.



Figure S3: TOF distribution in coincidence with *all* electrons at 10.3 eV. Besides the main dissociation channel  $C_8H_7OH^+$ , also the loss of  $H_2O$  can be observed in the experiment. The red curve corresponds to the model calculation, where all vibrational modes of the ion are regarded and temperature of 470 K was assumed. Since all electrons are considered in the experimental trace, it effectively shows an integral up to 10.3 eV, and the dissociation rate constant should be much lower and the peak width, much larger than in the model, which assumes internal energy selected parents. The kinetic shift is much smaller than predicted by this model.

### 3 Dissociative Photoionization

Figure S3 shows a typical time-of-flight mass spectrum of *o*-DHPC in coincidence with all electrons at 10.3 eV, where apart from the  $C_8H_7OH^+$  fragment also a  $H_2O$  loss channel was found. It is also clearly visible that the  $C_8H_7OH$  loss channel is only slightly asymmetric, which implies fast dissociation and only a small kinetic shift.

We also want to discuss our selected model in the light of an (*ab initio* statistical) model, where no ionic vibrational modes were disregarded and a sample temperature of 200 °C was assumed. Figure S4 a-c shows unreasonable fits (breakdown curve (a), CoG plot (b) and rate constants (c)) of the *o*-DHPC<sup>+</sup> dissociation. The lower temperature leads to a narrower breakdown diagram (Figure S4 a), which is not reproducing the experimental data well. If the low frequency vibrational modes of the ion were not disregarded in the model, the center of gravity plot (Figure S4 b) is shifted to higher flight times, meaning a larger kinetic shift, also indicated by slow rates (figure S4 c). This appears to be a wrong assumption, which is clarified in Figure S3, showing the calculated TOF distribution in red. Since all electrons are taken into account in this mass spectrum, the peak shape should appear broader than, if only threshold electrons were considered. In fact this is not the case so we assume that the model used in the main paper is more reliable.

In order to relate *ab initio* energies of the main fragmentation channel (formation of  $C_8H_7OH^+$ ) with the experimental  $E_0$ 's, we must first confirm that the latter correspond to the endothermicity of the dissociative photoionization and there is no overall reverse barrier along the reaction coordinate. In Figure S5 we show a possible reaction coordinate obtained with  $\omega$ -B97X-D/6-311G(d,p) constrained geometry optimization. The first part includes the stretching of the bridge C-atoms, which passes a transition state (TS<sub>1</sub>). During the dihedral scan of the intact  $CH_2-CH_2$  bridge another minimum was found (2). Further enlargement of this angle yields a transition state (TS<sub>2</sub>), which corresponds to the rotational barrier of the OH group, and leads to an open s-shaped structure (3). At this point the remaining bridge between the two rings was stretched, giving two



Figure S4: (a) fitted breakdown diagram of *o*-DHPC with a more realistic temperature of 470 K. (b) center of gravity plot the rates are not well described by the model. The overestimated kinetic shift moves the  $E_0$  to 10.25 eV.

hydroxy-xylylenes (4). Structures 1–4 in figure S5 are real minima without any imaginary frequencies. Both transition states  $TS_1$  and  $TS_2$  were obtained in a constrained geometry scan with a subsequently performed vibrational frequency calculation. In the absence of an overall reverse barrier the experimental appearance energy corresponds to the dissociative photoionization energy.



Figure S5: Reaction coordinate of the dissociation of *o*-DHPC. Three different constrained geometry scans were performed. Those are the elongation of the  $CH_2-CH_2$  bridge carbon atoms, giving transition state  $TS_1$  and during the dihedral scan a minimum structure 2 was obtained. Further scanning of this coordinate another  $TS_2$  was obtained, which corresponds to the rotational barrier of the OH group. The s-shaped structure 3 is also a minimum. Finally the remaining  $CH_2-CH_2$  bridge was elongated and two hydroxy-xylylenes (4) were generated.



Figure S6: Counterpoise correction in paracyclophane (left scale) as a function of basis set and its size (right scale), with respect to the xylylene fragments obtained with the M06-2X functional. The correction drops to below  $15 \text{ kJ mol}^{-1}$  with the 6-311++G(d,p) basis set, and below  $5 \text{ kJ mol}^{-1}$  with the aug-cc-pVTZ basis set. It was performed by methods known to the literature.<sup>[3]</sup> In brief, two xylylene fragments were calculated in their distorted structure as they can be found in the parent paracyclophane.

## References

- [1] J. Pfister, C. Schon, W. Roth, C. Kaiser, C. Lambert, K. Gruss, H. Braunschweig, I. Fischer, R. F. Fink and B. Engels, *J. Phys. Chem. A.*, 2011, **115**, 3583–3591.
- [2] B. Kovac, M. Mohraz, E. Heilbronner, V. Boekelheide and H. Hopf, *J. Am. Chem. Soc.*, 1980, **102**, 4314–4324.
- [3] P. Valiron and I. Mayer, *Chem. Phys. Lett.*, 1997, **275**, 46–55.
